# Supplementary material for: Formation of Stoichiometric CsFn Compounds
Source: PubMed Central journal article supplement (PMC4302300; doi:10.1038/srep07875), 2015-01-22
Supplement: srep07875-s1.pdf [file srep07875-s1.pdf]

# Supplementary Online Materials: Formation of Stoichiometric CsF<sub>n</sub> Compounds

Qiang Zhu,<sup>1, a)</sup> Artem R. Oganov,<sup>1, 2, 3</sup> and Qingfeng Zeng<sup>4</sup>

<sup>1)</sup>Department of Geosciences, Stony Brook University, Center for Materials by Design, Institute for Advanced Computational Science, Stony Brook University, NY 11794, USA

<sup>2)</sup>Department of Problems of Physics and Energetics, Moscow Institute of Physics and Technology, 9 Institutskiy lane, Dolgoprudny city, Moscow Region, 141700, Russia

<sup>3)</sup>School of Materials Science and Engineering, Northwestern Polytechnical University, Xi'an, 710072, China

<sup>4)</sup>Science and Technology on Thermostructural Composite Materials Laboratory, Northwestern Polytechnical University, Xi'an, 710072, China

(Dated: 16 June 2014)

## I. STABILITY OF CsF UNDER PRESSURE

Our detailed variable-composition structure searches between CsF and F, implicitly assume that CsF should be stable at all pressures. To check this, we also performed structure searches with up to 20 atoms for the entire composition space between Cs and F at 0 and 100 GPa, respectively. As shown in Fig. S1, we found that (1) CsF is stable at both ranges; (2) most of the new stoichiometries are located between CsF and F. This assures that our search strategy is correct.

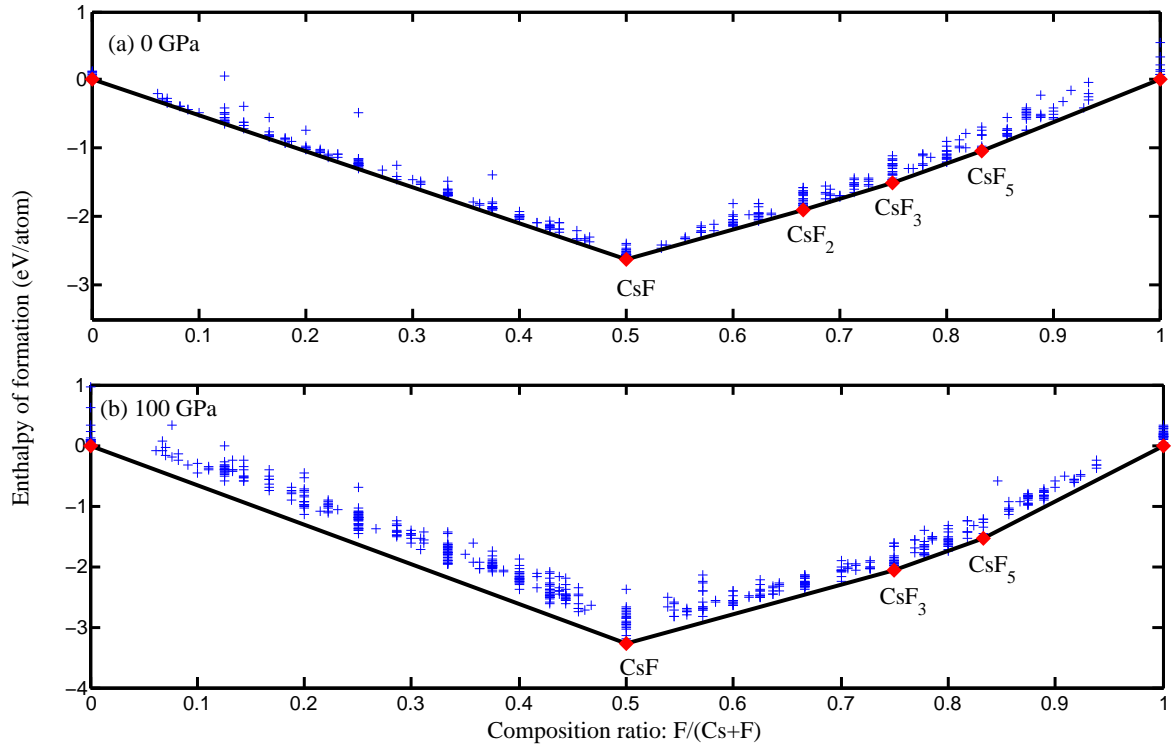

FIG. S1. Relatively stabilities for all compounds in the Cs-F system at (a) 0 GPa; and (b) 100 GPa, respectively.

<sup>a)</sup>Electronic mail: qiang.zhu@stonybrook.edu

## 23 II. VIBRATIONS AND THERMODYNAMICS OF $\text{CsF}_n$ AT AMBIENT PRESSURE

### 24 A. Free energy of solids

25 The calculated vibrational behaviors for  $\text{CsF}_n$  ( $n=1,2,3,5$ ) compounds under ambient pressures are given in Fig.  
 26 S2. All of the dispersion curves have no imaginary phonon frequencies, indicating that they are all dynamically stable.  
 27 The phonon densities of states were also calculated using a  $10 \times 10 \times 10$  grid of wave vectors.

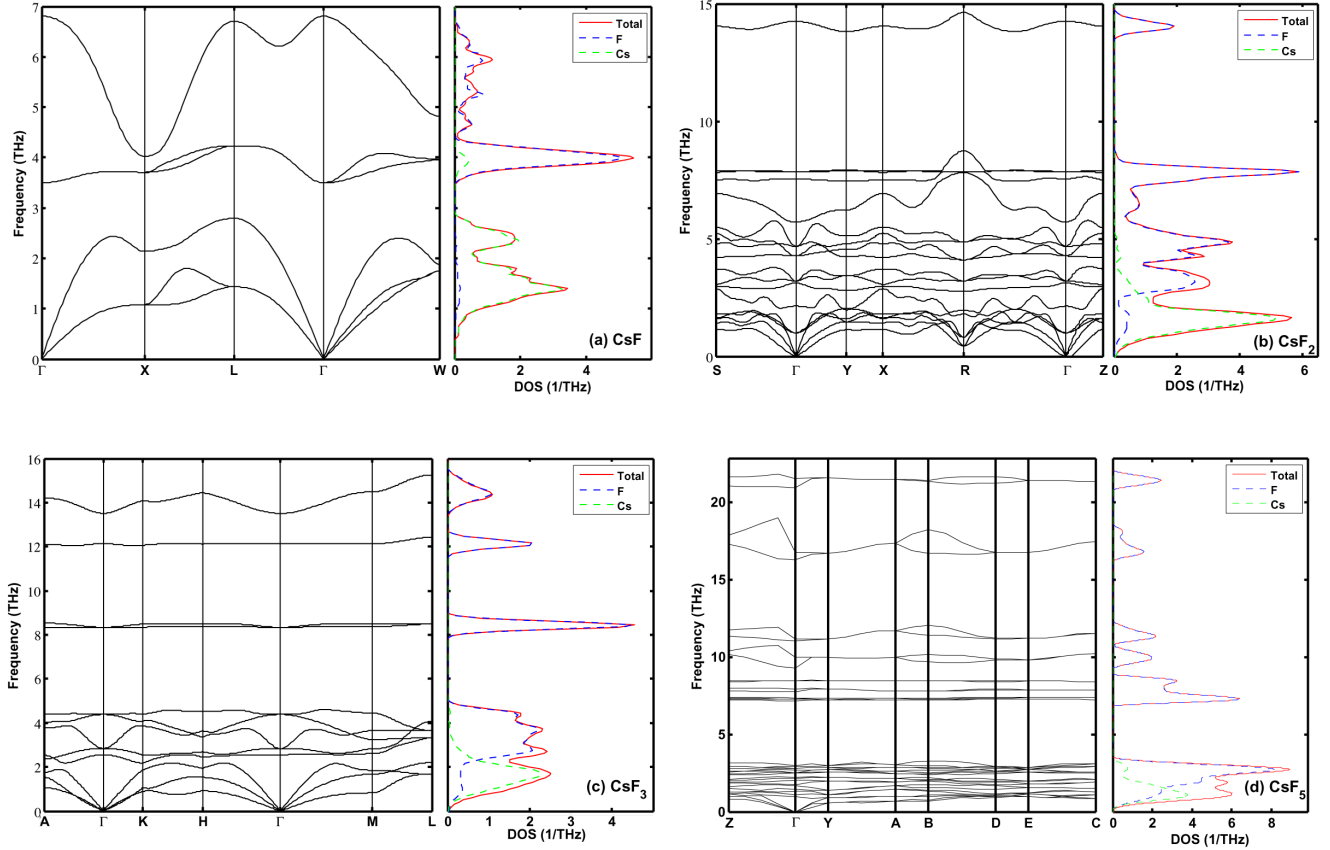

28

29 FIG. S2. Calculated phonon dispersion and density of states of (a)  $Fm\bar{3}m$ - $\text{CsF}$ ; (b)  $I4/mmm$ - $\text{CsF}_2$ ; (c)  $R\bar{3}m$ - $\text{CsF}_3$ ; (d)  
 30  $P2_1$ - $\text{CsF}_5$  at ambient pressure.  
 31

32 The free energy of solid (such as  $\text{CsF}_n$  compounds), can be expressed as,  
 33

$$G(T, V) = U(V) + F_{\text{elec}} + F_{\text{vib}}, \quad (1)$$

34 where  $U$  is the internal lattice energy, while  $F_{\text{elec}}$  and  $F_{\text{vib}}$  denote the electronic and vibrational contributions. The  
 35 electronic excitations are usually neglected, while vibrational contributions represents the phonon energy, which can  
 36 be treated in the harmonic approximation, by summing over the normal modes frequencies,

$$F_{\text{vib}} = \frac{1}{2} \sum_{i=1}^n hv_i \left[ \frac{1}{2} + \frac{1}{\exp(-hv_i/kT) - 1} \right], \quad (2)$$

37 where  $k$  is Boltzmann constant,  $h$  is Planck constant.

## 38 B. Free energy of F<sub>2</sub> gas

39 On the other hand, the free energy of diatomic F<sub>2</sub> gas molecule can be expressed as:

$$G(\text{F}_2) = U(\text{F}_2) + \frac{7}{2}k_B T - TS(\text{F}_2), \quad (3)$$

40 where the entropy  $S$  can be divided into three parts, namely, translation entropy  $S_{\text{trans}}$ , rotational entropy  $S_{\text{rot}}$ ,  
41 vibrational entropy  $S_{\text{vib}}$  and electronic entropy  $S_{\text{elec}}$ . Again,  $S_{\text{elec}}$  is neglected, while the other terms can be defined  
42 as,

$$\begin{aligned} S_{\text{trans}} &= \frac{5}{2}Nk + Nk \ln \left[ \frac{V}{N} \left( \frac{2\pi mkT}{h^2} \right)^{3/2} \right], \\ S_{\text{rot}} &= Nk + Nk \ln \frac{T}{2\Theta_{\text{rot}}}, \\ S_{\text{vib}} &= \frac{Nk\Theta_{\text{vib}} \left( \frac{1}{2} + \frac{1}{\exp(\Theta_{\text{vib}}/T) - 1} \right)}{T} + Nk \ln \left( \frac{\exp(-\Theta_{\text{vib}}/T)}{1 - \exp(-\Theta_{\text{vib}}/T)} \right). \end{aligned} \quad (4)$$

43 Here,  $\Theta_{\text{rot}}$  and  $\Theta_{\text{vib}}$  are the characteristic rotational and vibrational temperatures, respectively.

$$\begin{aligned} \Theta_{\text{rot}} &= \frac{(h/2\pi)^2}{2kI}, \\ \Theta_{\text{vib}} &= \frac{hv}{k}, \end{aligned} \quad (5)$$

44 where  $I$  is a molecular moment of inertia,  $v$  is the vibration frequency of F<sub>2</sub> molecule. To be consistent with the free  
45 energy calculation of solids, here we calculated the entropy of F<sub>2</sub> within the same functional. The relaxed F-F bond  
46 length in F<sub>2</sub> molecule is 1.43 Å, in satisfactory agreement with the experimental report (1.42 Å). The theoretical  
47 vibrational frequency for F-F stretching modes of F<sub>2</sub> is 30.1 THz, compared with the experimental value 27.489 THz.  
48 Note that the vibrational component of the gas entropy here is very small (less than 10% of the total).

49 The calculated temperature dependent  $S(\text{F}_2)$  is shown in Fig. S3. Compared to the experimental value ( $S^{\text{expt}}(\text{F}_2)$   
50 = 202.8 J/(mol · K)) at standard conditions, our results are close.

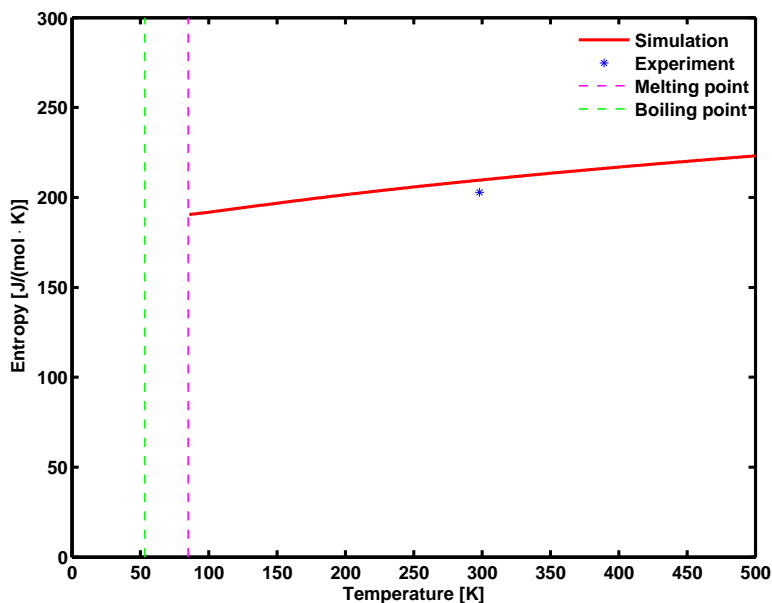

51

52 FIG. S3. The calculated entropy of F<sub>2</sub> gas at different temperatures. The melting point (53.48 K) and boiling point (85.03  
53 K) are also shown for being consistent.

54

55

### 56 C. Thermochemistry of the suggested reactions

57 By applying the eq. 1 and eq. 3, we obtain the formation energy of the suggested chemical reactions in Table 1.  
 58 The results are shown in S4. And the predicted decomposition temperatures are 491 K for CsF<sub>2</sub>, 423 K for CsF<sub>3</sub>,  
 59 and 258 K for CsF<sub>5</sub>, respectively. All of these temperatures are easily accessible, thus these materials are promising  
 60 for reversible fluorine storage materials.

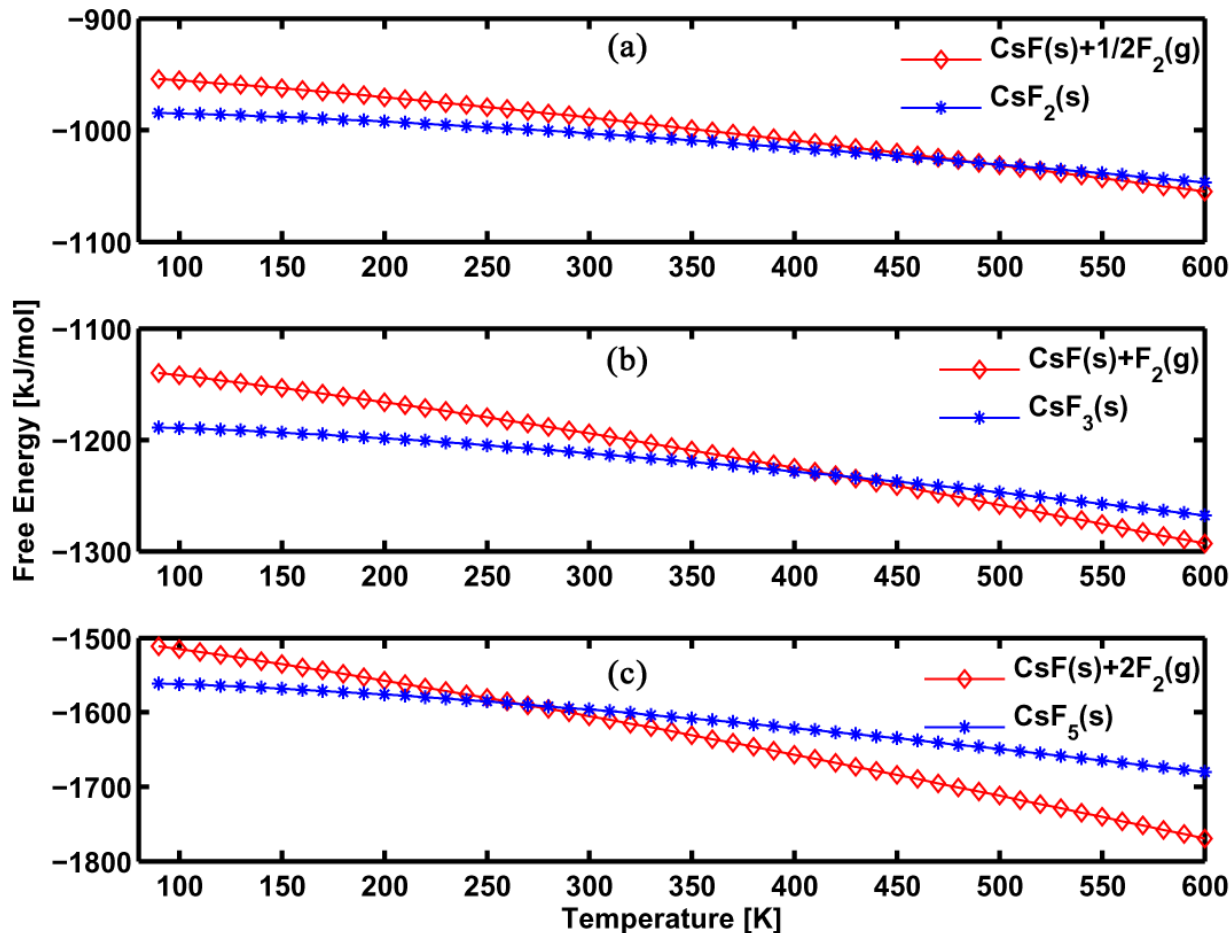

61  
 62 FIG. S4. The temperature dependence of free energy of the suggested chemical reactions (a)  $\text{CsF}_2 \rightarrow \text{CsF} + \frac{1}{2}\text{F}_2(\text{g})$ ; (b)  $\text{CsF}_3$   
 63  $\rightarrow \text{CsF} + \text{F}_2(\text{g})$ ; (c)  $\text{CsF}_5 \rightarrow \text{CsF} + 2\text{F}_2(\text{g})$ .  
 64  
 65

### 66 III. STABILITY OF CsF<sub>n</sub> (n>1) COMPOUNDS UNDER PRESSURE

67 The detailed results for variable-composition structure searches between CsF and F, are shown in Fig. S5. There  
 68 is clearly a general trend that the formation enthalpies of CsF<sub>n</sub> (n≥1) compounds decrease with pressure, suggesting  
 69 that the Cs atoms can be oxidized further.

70 For the predicted stable high pressure phases, we calculated phonon frequencies throughout the Brillouin zone using  
 71 the finite-displacement approach as implemented in the Phonopy code. As shown in Fig. S6, the absence of imaginary  
 72 frequencies ensures that the obtained structures are dynamically stable.  
 73

### 75 IV. CRYSTALLOGRAPHIC DATA

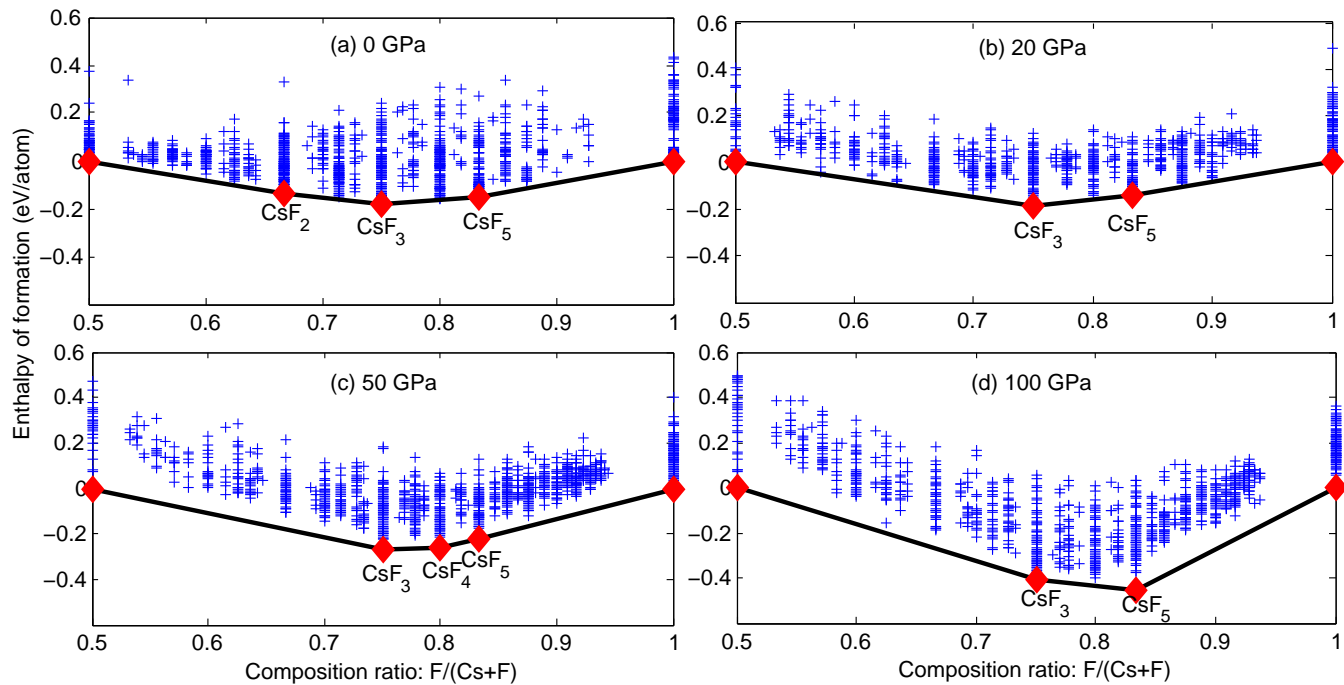

FIG. S5. Relatively stabilities for all compounds in the CsF-F system at (a) 0 GPa; (b) 20 GPa; (c) 50 GPa; and (d) 100 GPa, respectively.

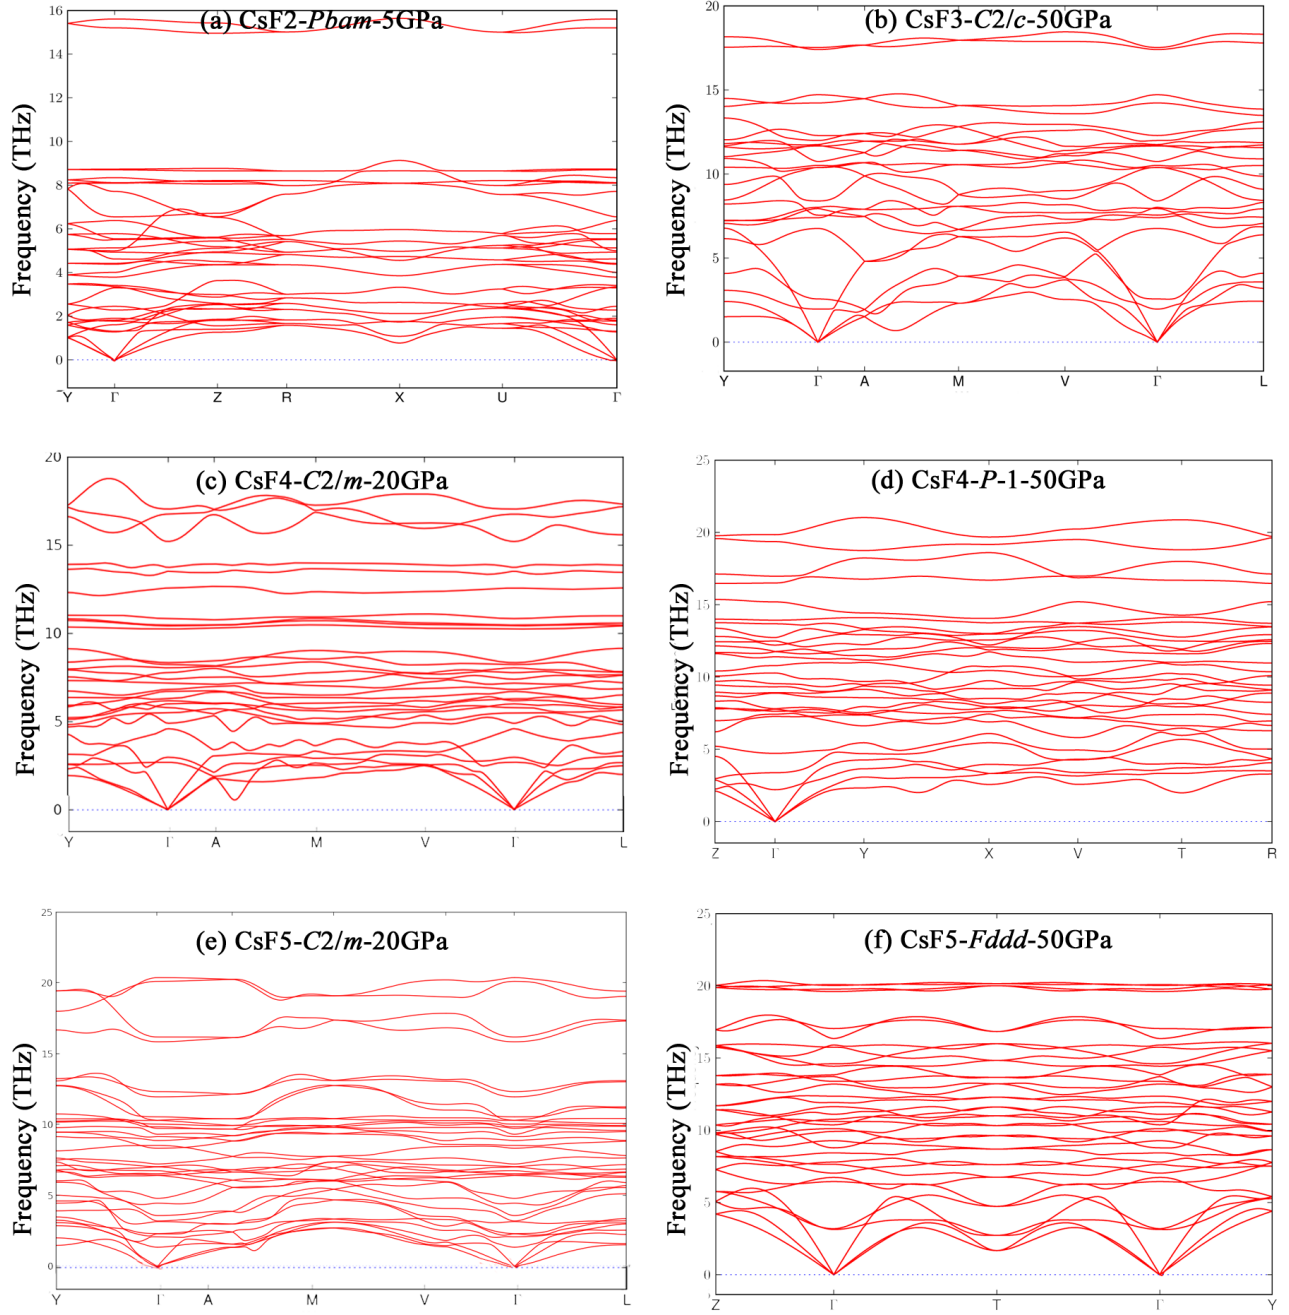

FIG. S6. Phonon dispersion curves of CsF<sub>n</sub> compounds (a) *Pbam*-CsF<sub>2</sub> at 5 GPa; (b) *C2/c*-CsF<sub>3</sub> at 50 GPa; (c) *C2/m*-CsF<sub>4</sub> at 20 GPa; (d) *P1*-CsF<sub>4</sub> at 50 GPa; (e) *C2/m*-CsF<sub>5</sub> at 20 GPa; and (f) *Fddd*-CsF<sub>4</sub> at 50 GPa respectively.

TABLE S1. The detailed crystal structures of CsF<sub>n</sub> compounds at different pressures.

| Phase            | Pressure<br>(GPa) | Space group                   | Lattice parameters                                                                                            | Atomic coordinates                                                                                                                                                                                                                                                                     |
|------------------|-------------------|-------------------------------|---------------------------------------------------------------------------------------------------------------|----------------------------------------------------------------------------------------------------------------------------------------------------------------------------------------------------------------------------------------------------------------------------------------|
| CsF <sub>2</sub> | 0                 | <i>I4/mmm</i>                 | a= 4.111 Å<br>c=16.163 Å                                                                                      | Cs(4e) 0.000 0.000 0.861<br>F1(4e) 0.000 0.000 0.682<br>F2(4e) 0.000 0.000 0.554                                                                                                                                                                                                       |
| CsF <sub>2</sub> | 10                | <i>Pbam</i>                   | a= 7.862 Å<br>b= 7.365 Å<br>c= 3.635 Å                                                                        | Cs(4g) 0.167 0.666 0.000<br>F1(4h) 0.039 0.107 0.500<br>F2(4h) 0.372 0.864 0.500                                                                                                                                                                                                       |
| CsF <sub>3</sub> | 0                 | <i>R<math>\bar{3}m</math></i> | a= 5.455 Å<br>c= 9.415 Å                                                                                      | Cs(3a) 0.000 0.000 0.000<br>F1(3b) 0.000 0.000 0.500<br>F2(6c) 0.000 0.000 0.315                                                                                                                                                                                                       |
| CsF <sub>3</sub> | 100               | <i>C2/c</i>                   | a= 6.322 Å<br>b= 3.692 Å<br>c= 6.382 Å<br>$\beta=100.65^\circ$                                                | Cs(4c) 0.250 0.250 0.000<br>F1(4e) 0.000 0.163 0.250<br>F2(8f) 0.612 0.172 0.119                                                                                                                                                                                                       |
| CsF <sub>4</sub> | 20                | <i>C2/m</i>                   | a= 7.207 Å<br>b= 4.609 Å<br>c= 8.724 Å<br>$\beta=58.43^\circ$                                                 | Cs1(2a) 0.000 0.000 0.000<br>Cs2(2b) 0.000 0.000 0.500<br>F1(4i) 0.189 0.000 0.607<br>F2(4i) 0.417 0.000 0.215<br>F3(4i) 0.429 0.000 0.611<br>F4(4i) 0.756 0.000 0.866                                                                                                                 |
| CsF <sub>4</sub> | 50                | <i>P-1</i>                    | a= 6.064 Å<br>b= 4.101 Å<br>c= 4.031 Å<br>$\alpha=88.68^\circ$<br>$\beta=84.76^\circ$<br>$\gamma=92.32^\circ$ | Cs1(1a) 0.000 0.000 0.000<br>Cs2(1b) 0.500 0.500 0.500<br>F1(2i) 0.527 0.780 0.913<br>F2(2i) 0.197 0.629 0.979<br>F3(2i) 0.269 0.980 0.448<br>F4(2i) 0.916 0.645 0.515                                                                                                                 |
| CsF <sub>4</sub> | 70                | <i>P-1</i>                    | a= 6.732 Å<br>b= 3.814 Å<br>c= 7.128 Å<br>$\alpha=97.63^\circ$<br>$\beta=88.30^\circ$<br>$\gamma=89.31^\circ$ | Cs1(2i) 0.858 0.070 0.244<br>Cs2(2i) 0.604 0.356 0.751<br>F1(2i) 0.086 0.738 0.496<br>F2(2i) 0.863 0.153 0.972<br>F3(2i) 0.964 0.530 0.792<br>F4(2i) 0.444 0.786 0.585<br>F5(2i) 0.526 0.215 0.103<br>F6(2i) 0.737 0.680 0.073<br>F7(2i) 0.253 0.301 0.609<br>F8(2i) 0.236 0.081 0.310 |
| CsF <sub>5</sub> | 0                 | <i>P2<sub>1</sub></i>         | a= 5.858 Å<br>b= 8.235 Å<br>b= 5.184 Å<br>$\beta=106.67^\circ$                                                | Cs(2a) 0.815 0.000 0.740<br>F1(2a) 0.777 0.234 0.232<br>F2(2a) 0.744 0.603 0.505<br>F3(2a) 0.220 0.267 0.764<br>F4(2a) 0.286 0.972 0.283<br>F5(2a) 0.517 0.250 0.014                                                                                                                   |
| CsF <sub>5</sub> | 10                | <i>C2/c</i>                   | a= 7.794 Å<br>b= 4.440 Å<br>c= 3.613 Å<br>$\beta=79.81^\circ$                                                 | Cs(4e) 0.000 0.801 0.250<br>F1(4e) 0.000 0.342 0.250<br>F2(8f) 0.327 0.013 0.719<br>F3(8f) 0.679 0.382 0.708                                                                                                                                                                           |
| CsF <sub>5</sub> | 30                | <i>C2/m</i>                   | a= 8.338 Å<br>b= 4.314 Å<br>b= 5.292 Å<br>$\beta=42.02^\circ$                                                 | Cs(2a) 0.000 0.000 0.000<br>F1(2c) 0.000 0.000 0.500<br>F2(4i) 0.345 0.000 0.497<br>F3(4i) 0.714 0.000 0.926                                                                                                                                                                           |
| CsF <sub>5</sub> | 100               | <i>Fdd2</i>                   | a=13.726 Å<br>b= 5.357 Å<br>c= 5.146 Å                                                                        | Cs(8a) 0.000 0.000 0.228<br>F1(8a) 0.000 0.000 0.853<br>F2(16b) 0.576 0.146 0.022<br>F3(16b) 0.162 0.499 0.346                                                                                                                                                                         |
